# Supplementary material
Source: publisher figshare collection journal article supplement (https://karger.figshare.com/ndownloader/files/25444682)
Supplement: Supplementary file 1 [file 25444682]

## Table S1. List of qPCR primers used in this study.

| **Primer name** | **Primer sequence 5'-->3'** | **Supplementary reference** |
| --- | --- | --- |
| cdc-42_qPCR_F | tca gcg ttg acg cag aag | [25] |
| cdc-42_qPCR_R | cat gga gac aag gaa gac gtt | [25] |
| tba-1_qPCR_F | tcc act gat ctc tgc tga caa | [25] |
| tba-1_qPCR_R | tgg atc gca ctt cac cat t | [25] |
| Y45F10D.4_qPCR_F | aag cgt cgg aac agg aat c | [25] |
| Y45F10D.4_qPCR_R | ttt ttc cgt tat cgt cga ctc | [25] |
| bre-4_qPCR_F | GAG CAA GTG GCG AAT CAG AC |  |
| bre-4_qPCR_R | ACG GTC ATC TTC GGG CAG TA |  |
| sqv-3_qPCR_F | TCC TCT TCG ATT TAA TAG AGC TTC TC |  |
| sqv-3_qPCR_R | TGG ATT GAC AGG CAA CAG AT |  |
| W02B12.11_qPCR_F | CGA AAC CGA TAA ATG GAC GA |  |
| W02B12.11_qPCR_R | GCT TTG GCT TGC CAT TCT T |  |
